# Supplementary material for: Estimating Effective Population Size from Linkage Disequilibrium between Unlinked Loci: Theory and Application to Fruit Fly Outbreak Populations
Source: PubMed Central journal article supplement (PMC3720881; doi:10.1371/journal.pone.0069078), 2013-07-23
Supplement: pone.0069078.s002.pdf [file pone.0069078.s002.pdf]

## Appendix S1. $\chi^2$ and $r^2$ for the composite haplotype table

Setting aside for the moment the complications of double-counting, the composite haplotype table of Figure 1 can be treated as a regular 2 x 2 contingency table. A one degree-of-freedom  $\chi^2$ , designated  $\chi^2(comp)$ , can be calculated. If the number of  $ab$  haplotypes,  $4n_{11} + 2n_{12} + 2n_{21} + n_{22}$  is given the designation  $M$ , then

$$\begin{aligned}\chi^2(comp) &= \frac{4S(4S.M - 2n_a 2n_b)^2}{2n_a.(4S - 2n_a).2n_b.(4S - 2n_b)} \\ &= \frac{4S(M.S - n_a n_b)^2}{n_a.(2S - n_a).n_b.(2S - n_b)}\end{aligned}$$

Gamete frequencies cannot be calculated in terms of just the  $n$  values of Figure 1, since the  $n_{22}$  parameter contains both  $ab/ - -$  (coupling) and  $a - / - b$  (repulsion) genotypes. The frequencies of these two types, which usually cannot be observed, may be given the designation  $n_{22c}$  and  $n_{22r}$ , where  $n_{22c} + n_{22r} = n_{22}$ . It is convenient to introduce the parameter  $\alpha = (n_{22c} - n_{22r})/2$ . Then the numbers of coupling and repulsion genotypes become  $n_{22}/2 + \alpha$  and  $n_{22}/2 - \alpha$  respectively. The gamete numbers are as shown in Table S1.

The one degree-of-freedom  $\chi^2(hap)$ , testing haplotypes from Table S1 is

$$\begin{aligned}\chi^2(hap) &= \frac{2S[2S(M/2 + \alpha) - n_a n_b]^2}{n_a.(2S - n_a).n_b.(2S - n_b)} \\ &= \frac{2S(M.S - n_a n_b)^2}{n_a.(2S - n_a).n_b.(2S - n_b)} + \frac{2S(2N\alpha)^2}{n_a.(2S - n_a).n_b.(2S - n_b)} + \alpha \text{ term} \\ &= \frac{1}{2}\chi^2(comp) + \frac{2S(2S\alpha)^2}{n_a.(2S - n_a).n_b.(2S - n_b)} + \alpha \text{ term},\end{aligned}$$

from which

$$\chi^2(comp) = 2\chi^2(hap) - \frac{4S(2S\alpha)^2}{n_a.(2S - n_a).n_b.(2S - n_b)} - \alpha \text{ term}$$

These terms allow calculation of the expectation of  $\chi^2(comp)$ ,  $E[\chi^2(comp)]$ , over repeated sampling of  $S$  diploid individuals. The term in  $\alpha$  has zero expectation. The regular 2 x 2 one degree-of-freedom  $\chi^2(hap)$  has expectation  $2S/(2S - 1)$  [20].

The term in  $\alpha^2$  is more difficult. The numerator of this term can be shown to have the expectation  $(2S)^4 p_a(1 - p_a)p_b(1 - p_b)$ , where  $p_a$  and  $p_b$  are gene frequencies at the  $a$  and  $b$  loci. The denominator similarly can be shown to have the expectation  $(2S)^2(2S - 1)^2 p_a(1 - p_a)p_b(1 - p_b)$ . Although there is a positive covariance between the numerator and denominator of this  $\alpha^2$  term, computer simulation has shown that the expectation of the ratio is extremely close to the ratio of expectations, which is  $(2S)^2/(2S - 1)^2$ .

Overall, therefore,

$$\begin{aligned}E[\chi^2(comp)] &= 2 \cdot \frac{2S}{2S - 1} - \frac{(2S)^2}{(2S - 1)^2} \\ &= 1 - \frac{1}{(2S - 1)^2}\end{aligned}\tag{1}$$

The  $\chi^2(comp)$  statistic thus has expectation very close to unity, and is less biased than the haploid  $\chi^2$  [20], [8]. Computer simulation also shows that the distribution of the  $\chi^2(comp)$  statistic is close to expectation in significance tests at the 5%, 1% and 0.1% levels. Results from  $10^8$  replicate samples of size  $S = 32$  set up with zero LD are shown in Table S2. In each case the observed significance levels are closer to expectation for the composite  $\chi^2$  than for the  $\chi^2$  calculated from just the known gametes.

The above calculations have all been for 2 x 2 tables. They extend to  $r \times c$  using the regular weighting for  $\chi^2$ , e.g. [17]

$$\chi^2_{(r-1)(c-1)} = \sum_i \sum_j \frac{D_{ij}^2}{p_i(1-p_i)q_j(1-q_j)} \cdot (1-p_i)(1-q_j) \quad (2)$$

Because the marginal totals for the composite table are just a multiple of 2 of the regular table, the same summation argument applies to both.

A similar expectation applies to  $r_c^2$  as to  $\chi^2(comp)$ . For a 2 x 2 table, with observed total  $S$ :

$$\chi^2 = S \cdot r^2$$

Because the weighting of contributions to  $\chi^2(comp)$  and  $r_c^2$  are different, cf. equation (2) above versus equation (7) of the main text, there is no simple relationship between the two. However the expectations for the components of  $r_c^2$  and  $\chi^2(comp)$  differ only by the factor  $S$ , and the overall expectation for  $r_c^2$  is given from (1) as

$$E[r_c^2] = \frac{1}{S} \cdot \left[ 1 - \frac{1}{(2S-1)^2} \right] \quad (3)$$

The validity of equations (2) and (3) can be tested by simulation. For the  $\chi^2(comp)$  calculation, a set of approximately  $10^{10}$  simulations with  $S = 32$  gave a mean value of  $0.999741 \pm 0.000070$  compared to expectation of  $1 - 1/63^2 = 0.999748$ . As pointed out in Table S2, the distribution is also very close to a  $\chi^2$  distribution.

Table S1 Numbers of the four haplotypes in terms of  $n$  values shown in Figure 1 and the parameter  $\alpha$  giving the (unobservable) difference between coupling and repulsion genotypes.

|       | b                                                                            | -                                                        | Total      |
|-------|------------------------------------------------------------------------------|----------------------------------------------------------|------------|
| $a$   | $2n_{11} + n_{12} + n_{21} + \frac{1}{2}n_{22} + \alpha$<br>$= M/2 + \alpha$ | $2n_{13} + n_{12} + n_{23} + \frac{1}{2}n_{22} - \alpha$ | $n_a$      |
| -     | $2n_{31} + n_{21} + n_{32} + \frac{1}{2}n_{22} - \alpha$                     | $2n_{33} + n_{23} + n_{32} + \frac{1}{2}n_{22} + \alpha$ | $2S - n_a$ |
| Total | $n_b$                                                                        | $2S - n_b$                                               | $2S$       |

Table S2 Observed and expected numbers of significant deviations from expectation from  $\chi^2$  values calculated from replicate sampling with  $S = 32$  from an infinitely large population in linkage equilibrium.

|                      | Significance level |           |         |
|----------------------|--------------------|-----------|---------|
|                      | 5%                 | 1%        | 0.1%    |
| Observed (composite) | 5,023,330          | 998,632   | 98,622  |
| Observed (haploid)   | 5,061,141          | 958,095   | 80,383  |
| Expected             | 5,000,000          | 1,000,000 | 100,000 |
