# Supplementary material for: Estimating Effective Population Size from Linkage Disequilibrium between Unlinked Loci: Theory and Application to Fruit Fly Outbreak Populations
Source: PubMed Central journal article supplement (PMC3720881; doi:10.1371/journal.pone.0069078), 2013-07-23
Supplement: pone.0069078.s003.pdf [file pone.0069078.s003.pdf]

## Appendix S2. $\chi^2$ as a measure of LD for multiple alleles

An undesirable consequence of the  $\chi^2$  weighting of  $r^2$  is shown in Figure S1. This considers a 2-allele model with complete association between genes at the two loci ( $r^2 = 1$ ,  $\chi^2 = 2N = 100$ ). A single mutation to a new allele occurs at the  $a$  locus. The average value of  $r^2$  estimated using  $\chi^2$  weighting falls from 1.0 to 0.5. On the other hand the average value of  $r^2$  estimated using equation (22) is reduced only slightly, to 0.97. The  $\chi^2$  weighting of individual  $r^2$  values gives inappropriate weighting to low frequency alleles compared either to a straight averaging or using the frequency-weighted averaging recommended here.
