# Supplementary material for: Estimating Effective Population Size from Linkage Disequilibrium between Unlinked Loci: Theory and Application to Fruit Fly Outbreak Populations
Source: PubMed Central journal article supplement (PMC3720881; doi:10.1371/journal.pone.0069078), 2013-07-23
Supplement: pone.0069078.s004.pdf [file pone.0069078.s004.pdf]

### Appendix S3. The effect of null alleles on $r^2$

We consider genotype and composite gamete frequencies for the case where there is a null allele at the  $a$  locus. Six gamete genotypes are now possible, with frequencies:

|            |       |       |       |       |       |       |
|------------|-------|-------|-------|-------|-------|-------|
| Gamete:    | $ab$  | $a_-$ | $_b$  | $--$  | $nb$  | $n_-$ |
| Frequency: | $P_1$ | $P_2$ | $P_3$ | $P_4$ | $P_5$ | $P_6$ |

Frequencies of the genes at the  $a$  locus,  $a$ ,  $-$  and  $n$  are respectively  $p_a$ ,  $p_-$  and  $p_n$ , also summing to 1.

Table S3 gives the expected composite frequencies under random mating of all genotypes that contribute to the composite  $ab$  haplotype, using the rules outlined in connection with Figure 1. Summing the final column of Table S3, the total  $ab$  haplotype frequency,  $p_{ab}(comp)$ , simplifies to  $P_1 - D_n/2 + p_a P_5$ , where  $D_n = P_1 P_4 - P_2 P_3$ . Frequencies of the other three gametes can also be written down in the same terms:  $p_{a_-}(comp) = P_2 + D_n/2 + p_a P_6$ ,  $p_{_b}(comp) = P_3 + D_n/2 + p_- P_5$ ,  $p_{--}(comp) = P_4 - D_n/2 + p_- P_6$ . The sum of these four is  $1 - p_n^2$ , consistent with the fact that homozygous null alleles at the  $a$  locus cannot be scored.

Calculating the observed LD parameter,  $D(comp) = p_{ab}(comp)p_{--}(comp) - p_{a_-}(comp)p_{_b}(comp)$ , divided by the factor  $(1 - p_n^2)^2$ . This gives:

$$D(comp) = \frac{1}{2} \frac{D_n}{(1 - p_n)^2}$$

Assuming further that the null allele at the  $a$  locus is not in LD with alleles at the  $b$  locus,

$$D_n = D(1 - p_n)$$

from which

$$D(comp) = \frac{1}{2} \frac{D}{(1 - p_n)}$$

The calculations are considerably more complicated when there are null alleles at both loci rather than one of the two. However simulation shows that the effects on  $N_e$  are approximately what would be expected from summing the effects at the individual loci.

Table S3 Expected frequencies of  $ab$  composite gametes with null allele at  $a$  locus

| Genotype | Genotype frequency | Gamete fraction | Gamete frequency    |
|----------|--------------------|-----------------|---------------------|
| $ab/ab$  | $P_1^2$            | 1               | $P_1^2$             |
| $ab/a_-$ | $2P_1P_2$          | $\frac{1}{2}$   | $P_1P_2$            |
| $ab/_b$  | $2P_1P_3$          | $\frac{1}{2}$   | $P_1P_3$            |
| $ab/--$  | $2P_1P_4$          | $\frac{1}{4}$   | $\frac{1}{2}P_1P_4$ |
| $a_-/_b$ | $2P_2P_3$          | $\frac{1}{4}$   | $\frac{1}{2}P_2P_3$ |
| $ab/nb$  | $2P_1P_5$          | 1               | $2P_1P_5$           |
| $ab/n_-$ | $2P_1P_6$          | $\frac{1}{2}$   | $P_1P_6$            |
| $a_-/nb$ | $2P_2P_5$          | $\frac{1}{2}$   | $P_2P_5$            |
